# Supplementary material
Source: Springer Nature journal article supplement (https://www.springermedizin.de/resource/supplementary/12974_2010_247_MOESM1_ESM.pdf/9601092)

# Intracellular ROS (% of Control)

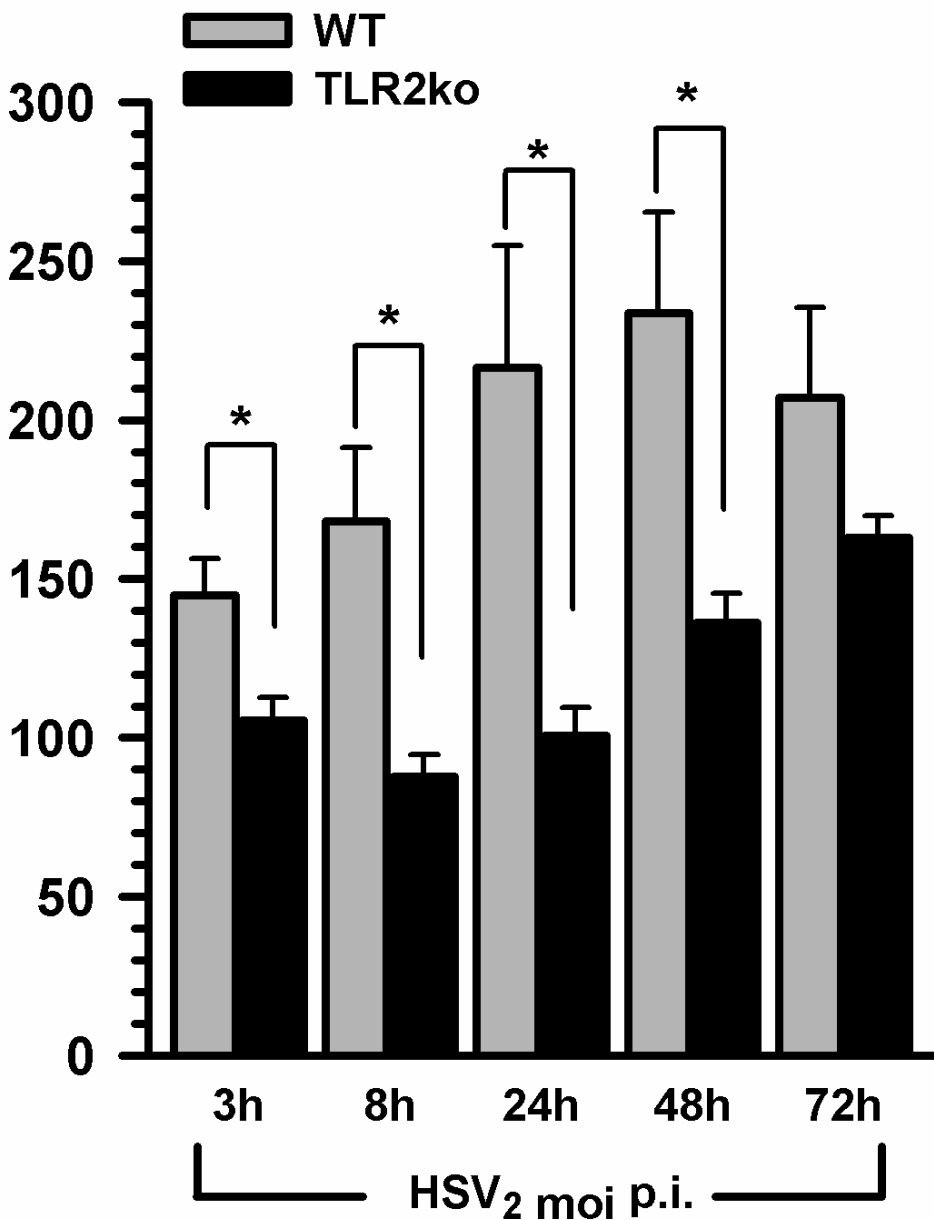

Supplement: MOESM1 [file 9601092]
